# Supplementary material
Source: Research Square preprint supplement (doi:10.21203/rs.3.rs-9814760/v1)
Supplement: Supplementary file 1 [file 541aea5e5932e8a01a183b1d.docx]

**Table 1: Univariate associations between demographic, clinical characteristics, technique-related factors, and acceptability outcome measures and subtheme thematic analysis.**

|  | **Awareness**  **OR (95% CI)** | **Positive emotions towards treatment**  **OR (95% CI)** | **Negative emotions towards treatment**  **OR (95% CI)** | **Perceived safety**  **OR (95% CI)** | **Perceived effectiveness**  **OR (95% CI)** | **Likelihood of starting treatment**  **OR (95% CI)** | **Likelihood of completing treatment**  **OR (95% CI)** | **Subtheme thematic analysis from free text responses** |
| --- | --- | --- | --- | --- | --- | --- | --- | --- |
| **Demographic factors** | | | | | | | | |
| **Age** | **TMS**  0.987  (0.972 – 1.002)  **tES**  0.995  (0.979-1.011) | **TMS**  0.988  (0.975-1.002)  **tES**  0.993  (0.979-1.006)  **Combined**  0.989  (0.975-1.002) | **TMS**  0.992  (0.978-1.007)  **tES**  0.991  (0.976-1.006)  **Combined**  0.992  (0.978-1.006) | **TMS**  0.990  (0.976-1.004)  **tES**  0.990  (0.976-1.004)  **Combined**  1.002  (0.988-1.015) | **TMS**  0.997  (0.980-1.015)  **tES**  0.986  (0.969-1.002)  **Combined**  0.968****  (0.952-0.983) | **TMS**  0.996  (0.982-1.009)  **tES clinic**  0.995  (0.982-1.008)  **tES home**  1.010  (0.997-1.017)  **Combined**  1.003  (0.990-1.017) | **TMS**  1.006  (0.993-1.020)  **tES clinic**  1.002  (0.989-1.016)  **tES home**  1.016*  (1.003-1.029)  **Combined**  1.005  (0.992-1.019) | No specific insights were revealed for age. |
| **Gender**  **(Male comparison group)** | **TMS**  1.133  (0.784-1.637)  **tES**  1.059  (0.715-1.572) | **TMS**  0.703*  (0.505-0.979)  **tES**  0.829  (0.597-1.152)  **Combined**  0.758  (0.544-1.055) | **TMS**  1.256  (0.876-1.802)  **tES**  0.891  (0.620-1.284)  **Combined**  1.326  (0.937-1.876) | **TMS**  0.770  (0.542-1.094)  **tES**  1.026  (0.728-1.445)  **Combined**  0.827  (0.592-1.156) | **TMS**  1.047  (0.683-1.605)  **tES**  1.052  (0.710-1.555)  **Combined**  0.972  (0.669-1.408) | **TMS**  0.763  (0.539-1.046)  **tES clinic**  0.791  (0.568-1.104)  **tES home**  0.964  (0.697-1.337)  **Combined**  0.741  (0.534-1.029) | **TMS**  0.657*  (0.471-0.914)  **tES clinic**  0.674*  (0.485-0.938)  **tES home**  0.754  (0.544-1.045)  **Combined**  0.668*  (0.481-0.927) | Men reported more positive attitudes towards TMS and greater likelihood of completing clinic-based treatments.  For tES, men were interested to know about effectiveness and women frequently reported concerns around accessibility. |
| **Ethnicity** | | | | | | | | |
| **Black**  **(White comparison group)** | **TMS**  0.640  (0.346-1.185)  **tES**  0.929  (0.495-1.744) | **TMS**  0.656  (0.388-1.107)  **tES**  0.767  (0.455-0.773)  **Combined**  0.585*  (0.344-0.996) | **TMS**  1.151  (0.658-2.014)  **tES**  0.820  (0.453-1.483)  **Combined**  1.735*  (1.011-2.980) | **TMS**  0.530*  (0.305-0.919)  **tES**  0.768  (0.445-1.324)  **Combined**  0.370 ****  (0.217-0.630) | **TMS**  1.103  (0.560-2.173)  **tES**  1.322  (0.721-2.423)  **Combined**  0.854  (0.467-1.559) | **TMS**  0.868  (0.515-1.464)  **tES clinic**  0.964  (0.570-1.629)  **tES home**  0.614  (0.366-1.028)  **Combined**  0.511*  (0.303-0.851) | **TMS**  0.705  (0.419-1.184)  **tES clinic**  0.786  (0.468-1.319)  **tES home**  0.568*  (0.339-0.954)  **Combined**  0.454***  (0.269-0.766) | More Black (35%) participants described concerns about side effects of combined NIBS in their free-text responses, while fewer White Participants (22%) expressed such concerns. |
| **Asian**  **(White comparison group)** | **TMS**  1.340  (0.838-2.145)  **tES**  1.402  (0.852-2.307) | **TMS**  0.929  (0.599-1.441)  **tES**  0.797  (0.514-1.236)  **Combined**  0.817  (0.526-1.269) | **TMS**  0.755  (0.462-1.234)  **tES**  1.351  (0.842-2.168)  **Combined**  1.442  (0.912-2.280) | **TMS**  0.865  (0.542-1.381)  **tES**  Asian  0.515***  (0.326-0.815)  **Combined**  0.524***  (0.334-0.820) | **TMS**  1.281  (0.731-2.248)  **tES**  0.904  (0.533-1.533)  **Combined**  1.071  (0.652-1.763) | **TMS**  0.966  (0.623-1.499)  **tES clinic**  0.815  (0.524-1.269)  **tES home**  0.669  (0.433-1.033)  **Combined**  0.723  (0.467-1.119) | **TMS**  0.943  (0.608-1.461)  **tES clinic**  0.732  (0.473-1.132)  **tES home**  0.563**  (0.364-1.148)  **Combined**  0.695  (0.450-1.074) | Asian participants expressed greater safety concerns regarding tES-containing techniques, while White participants had more concerns around lack of prior training and confidence to operate home-based devices independently.  A few (N = 3) Asian participants felt they would be discouraged into having NIBS by their family members. This concern was not expressed by those from any other ethnicity. |
| **Mixed**  **(White comparison group)** | **TMS**  0.968  (0.586-1.597)  **tES**  1.165  (0.688-1.974) | **TMS**  0.890  (0.566-1.402)  **tES**  0.731  (0.463-1.150)  **Combined**  1.054  (0.670-1.659) | **TMS**  1.467  (0.907-2.370)  **tES**  1.280  (0.784-2.092)  **Combined**  1.164  (0.723-1.874) | **TMS**  0.730  (0.450-1.182)  **tES**  0.773  (0.481-1.242)  **Combined**  0.862  (0.542-1.372) | **TMS**  0.677  (0.365-1.255)  **tES**  0.689  (0.394-1.203)  **Combined**  1.280  (0.771-2.123) | **TMS**  0.818  (0.519-1.288)  **tES clinic**  0.773  (0.489-1.220)  **tES home**  0.651  (0.415-1.020)  **Combined**  0.789  (0.503-1.239) | **TMS**  0.883  (0.562-1.390)  **tES clinic**  0.780  (0.497-1.224)  **tES home**  0.537**  (0.342-0.844)  **Combined**  0.801  (0.512-1.255) | Mixed ethnicity participants tended to use more extreme adjectives (e.g. fear) when describing their concerns about techniques compared to White participants. |
| **Sample (Prolific vs non-Prolific)**  **(Prolific comparison group)** | **TMS**  3.770****  (2.550-5.573)  **tES**  2.088****  (1.392-3.130) | **TMS**  1.134  (0.791-1.626)  **tES**  1.036  (0.723-1.483)  **Combined**  1.545*  (1.077-2.217) | **TMS**  0.861  (0.581-1.274)  **tES**  1.019  (0.687-1.511)  **Combined**  0.553***  (0.375-0.816) | **TMS**  0.789  (0.538-1.157)  **tES**  1.135  (0.780-1.655)  **Combined**  1.600  (1.103-2.319) | **TMS**  1.600*  (1.009-2.540)  **tES**  1.175  (0.766-1.800)  **Combined**  1.709**  (1.143-2.555) | **TMS**  1.223  (0.852-1.754)  **tES clinic**  1.104  (0.769-1.586)  **tES home**  1.207  (0.845-1.725)  **Combined**  1.850****  (1.289-2.654) | **TMS**  1.021  (0.713-1.462)  **tES clinic**  0.982  (0.687-1.405)  **tES home**  1.178  (0.824-1.684)  **Combined**  1.516*  (1.061-2.166) | No specific insights were revealed between the two groups. |
| **Clinical characteristics** | | | | | | | | |
| **Levels of activity limitation**  **(No limitation comparison group)** | **TMS**  1.623**  (1.126-2.335)  **tES**  1.480*  (1.003-2.184) | **TMS**  0.838  (0.605-1.161)  **tES**  0.717*  (0.518-0.993)  **Combined**  0.845  (0.610-1.171) | **TMS**  1.687***  (1.182-2.411)  **tES**  1.861****  (1.293-2.678)  **Combined**  1.290  (0.918-1.817) | **TMS**  0.935  (0.660-1.324)  **tES**  0.706*  (0.502-0.993)  **Combined**  0.973  (0.699-1.355) | **TMS**  0.757  (0.492-1.164)  **tES**  0.660*  (0.445-0.980)  **Combined**  0.813  (0.556-1.177) | **TMS**  0.966  (0.698-1.338)  **tES clinic**  0.927  (0.668-1.285)  **tES home**  0.981  (0.712-1.353)  **Combined**  0.930  (0.673-1.283) | **TMS**  0.809  (0.584-1.119)  **tES clinic**  0.755  (0.546-1.044)  **tES home**  1.008  (0.731-1.390)  **Combined**  0.783  (0.568-1.080) | While time commitment was a common barrier between both groups, travelling and accessibility were bigger barriers for those with activity limitations.  Those with activity limitations were more concerned about specific side effects that would worsen their existing conditions, compared to general side effects listed by those without activity limitations. |
| **Current/ previous diagnosis of chronic pain**  **(No diagnosis comparison group)** | **TMS**  1.313  (0.869-1.982)  **tES**  1.192  (0.769-1.852) | **TMS**  0.891  (0.609-1.306)  **tES**  0.834  (0.569-1.221)  **Combined**  1.035  (0.707-1.514) | **TMS**  1.850***  (1.235-2.773)  **tES**  1.654*  (1.101-2.487)  **Combined**  1.315  (0.885-1.954) | **TMS**  0.975  (0.650-1.462)  **tES**  0.890  (0.598-1.323)  **Combined**  1.051  (0.713-1.550) | **TMS**  1.311  (0.804-2.138)  **tES**  0.757  (0.476-1.203)  **Combined**  0.766  (0.493-1.190) | **TMS**  1.129  (0.770-1.652)  **tES clinic**  1.154  (0.786-1.692)  **tES home**  1.250  (0.857-1.822)  **Combined**  0.954  (0.654-1.392) | **TMS**  1.165  (0.796-1.704)  **tES clinic**  0.997  (0.683-1.456)  **tES home**  1.145  (0.785-1.669)  **Combined**  0.972  (0.667-1.416) | No specific insights were revealed for those with and without chronic pain. |
| **Current/ past carer**  **(Non-carer comparison group)** | **TMS**  1.576*  (1.094-2.270)  **tES**  1.328  (0.900-1.958) | **TMS**  1.161  (0.830-1.624)  **tES**  1.398*  (1.000-1.954)  **Combined**  1.281  (0.916-1.793) | **TMS**  0.618*  (0.426-0.896)  **tES**  0.605**  (0.414-0.884)  **Combined**  0.649*  (0.455-0.018) | **TMS**  0.983  (0.688-1.405)  **tES**  1.353  (0.952-1.923)  **Combined**  1.436*  (1.018-2.026) | **TMS**  1.587*  (1.027-2.454)  **tES**  1.809***  (1.214-2.699)  **Combined**  1.730***  (1.185-2.527) | **TMS**  1.380  (0.985-1.933)  **tES clinic**  1.719***  (1.223-2.416)  **tES home**  1.534*  (1.099-2.140)  **Combined**  1.799****  (1.285-2.519) | **TMS**  1.168  (0.836-1.632)  **tES clinic**  1.587**  (1.134-2.221)  **tES home**  1.543*  (1.105-2.153)  **Combined**  1.502*  (1.078-2.096) | Although caring responsibilities were often mentioned as barriers, many of the carers had little concerns about NIBS and found them interesting and curious.  Non-carers were more worried about self-administering tES at home and there were more scepticism and concerns around ethicality.  Carers frequently considered how their family members would benefit or be harmed from NIBS, should their family also undergo NIBS treatment. |
| **Current/ previous treatment** | | | | | | | | |
| **Prescribed medication**  **(No prescribed medication comparison group)** | **TMS**  1.091  (0.726-1.639)  **tES**  1.250  (0.806-1.939) | **TMS**  1.501*  (1.044-2.160)  **tES**  1.392  (0.969-2.002)  **Combined**  1.381  (0.960-1.990) | **TMS**  0.815  (0.550-1.207)  **tES**  0.755  (0.507-1.124)  **Combined**  0.751  (0.514-1.097) | **TMS**  1.721**  (1.169-2.535)  **tES**  1.214  (0.833-1.770)  **Combined**  1.465*  (1.013-2.117) | **TMS**  0.999  (0.623-1.606)  **tES**  1.387  (0.894-2.153)  **Combined**  1.116  (0.739-1.685) | **TMS**  1.454*  (1.011-2.092)  **tES clinic**  1.392  (0.967-2.006)  **tES home**  1.523*  (1.064-2.181)  **Combined**  1.419  (0.989-2.034) | **TMS**  1.510  (1.051-2.166)  **tES clinic**  1.408  (0.982-2.020)  **tES home**  1.432*  (1.001-2.050)  **Combined**  1.468*  (1.025-2.102) | Participants with prior medication treatment were less worried about side effects and perceived NIBS as more effective than those without prior medication in free-text responses.  For combined NIBS, participants with prior medication treatment were more interested in its effectiveness, while those without prior medication were more worried about its side effects. |
| **Psychological therapy**  **(No psychological therapy comparison group)** | **TMS**  0.982  (0.641-1.504)  **tES**  0.900  (0.571-1.419) | **TMS**  1.214  (0.831-1.774)  **tES**  0.928  (0.635-1.354)  **Combined**  1.063  (0.727-1.554) | **TMS**  1.537*  (1.012-2.333)  **tES**  1.600*  (1.044-2.452)  **Combined**  1.487  (0.996-2.221) | **TMS**  0.994  (0.665-1.487)  **tES**  0.836  (0.563-1.241)  **Combined**  0.812  (0.552-1.195) | **TMS**  0.795  (0.485-1.305)  **tES**  0.653  (0.415-1.028)  **Combined**  0.878  (0.571-1.349) | **TMS**  0.809  (0.553-1.182)  **tES clinic**  0.733  (0.500-1.073)  **tES home**  0.792  (0.544-1.151)  **Combined**  0.807  (0.554-1.175) | **TMS**  0.761  (0.522-1.111)  **tES clinic**  0.710  (0.487-1.037)  **tES home**  0.831  (0.572-1.209)  **Combined**  0.892  (0.614-1.297) | Participants with prior psychological therapy were more worried about side effects, whereas those without prior psychological therapy were more worried about practicalities and accessibility of NIBS. |
| **Awareness** | | | | | | | | |
| **TMS Awareness** |  | **TMS**  1.409****  (1.164-1.706)  **tES**  1.294**  (1.071-1.564)  **Combined**  1.419****  (1.174-1.718) | **TMS**  0.835  (0.678-1.029)  **tES** 1.020  (0.830-1.254)  **Combined**  0.814*  (0.666-0.996) | **TMS**  1.347***  (1.099-1.652)  **tES**  1.370***  (1.122-1.674)  **Combined**  1.471****  (1.208-1.793) | **TMS**  1.685****  (1.322-2.147)  **tES**  1.370***  (1.122-1.674)  **Combined**  1.749****  (1.413-2.166) | **TMS**  1.501****  (1.239-1.820)  **tES clinic**  1.388****  (1.146-1.682)  **tES home**  1.165  (0.967-1.405)  **Combined**  1.384****  (1.146-1.672) | **TMS**  1.262*  (1.044-1.527)  **tES clinic**  1.192  (0.987-1.439)  **tES home**  1.036  (0.859-1.247)  **Combined**  1.296**  (1.074-1.564) |  |
| **tES Awareness** |  | **TMS**  1.406****  (1.153-1.714)  **tES**  1.319**  (1.083-1.606)  **Combined**  1.542****  (1.264-1.879) | **TMS**  0.868  (0.698-1.079)  **tES**  0.981  (0.791-1.218)  **Combined**  0.826  (0.670-1.019) | **TMS**  1.373***  (1.110-1.697)  **tES**  1.652****  (1.336-2.044)  **Combined**  1.570****  (1.275-1.933) | **TMS**  1.598****  (1.249-2.044)  **tES**  1.589****  (1.264-1.996)  **Combined**  1.866****  (1.499-2.326) | **TMS**  1.655****  (1.353-2.028)  **tES clinic**  1.502****  (1.229-1.837)  **tES home**  1.284*  (1.054-1.562)  **Combined**  1.662****  (1.359-2.030) | **TMS**  1.461****  (1.195-1.784)  **tES clinic**  1.326***  (1.088-1.616)  **tES home**  1.191  (0.979-1.448)  **Combined**  1.525****  (1.252-1.859) |  |

Glossary

1. * = p≤0.05

2. ** = p≤0.01

3. *** = p≤0.005

4. **** = p≤0.001

5. OR = Odds ratio

6. CI = Confidence Interval

7. Positive emotions include interested, hopeful, comfortable, and excited.

8. Negative emotions include angry, confused, worried, and sceptical.

9. TMS = Transcranial magnetic stimulation

10. tES = Transcranial electrical stimulation

11. Combined = Combined non-invasive brain stimulation (transcranial magnetic stimulation + transcranial electrical stimulation)

12. Black includes African, Caribbean, and any other Black, Black British, or Caribbean background.

13. Asian includes Bangladeshi, Chinese, Indian, Pakistani, and any other Asian background.

14. Mixed includes White and Asian, White and Black African, White and Black Caribbean, and any other mixed or multiple ethnic background.

15. White includes English, Irish, Scottish, Welsh, Northern Irish or British, and any other White background.

16. Devolved nations include Northern Ireland, Scotland, and Wales.

17. Northern England includes Northeast England, Northwest England, and Yorkshire and Humber.

18. Midlands include East Midlands and West Midlands.

19. South and East England include East England, Southeast England, and Southwest England.

Note

1. For current/ previous treatment, ordinal regression model combined all types of current or previous treatment.

**Table 2: Enablers of non-invasive brain stimulation techniques.**

| **Theoretical Framework of Acceptability Themes** | **Perceived**  **effectiveness** | **Intervention coherence** | **Burden** | **Opportunity costs, burden, and self-efficacy** | |
| --- | --- | --- | --- | --- | --- |
|  | **Effectiveness** | **Mechanism of action** | **Side effects** | **Practicalities and cost** | **Accessibility** |
| **Transcranial magnetic stimulation** | • More understanding and statistics of effectiveness for comorbid disorder and resistant cases  • Anecdotes from service users who had treatment | • More understanding of interaction with other treatment | • Having a ‘test dose’ | • Reimbursement of travel cost  • Reimbursement of loss of opportunity cost  • More flexible treatment regime schedule  • Having multiple or accelerated treatment sessions in a single clinic attendance  • Support from healthcare professionals | • Reduce waiting list times  • More availability in local area and general practice |
| **Transcranial electrical stimulation (clinic)** | • More understanding and statistics of effectiveness for comorbid disorder and resistant cases  • Evidence of clinical effectiveness |  | • More evidence of safety | • More flexible treatment regime schedule  • A conducive area to rest after treatment  • Provision of fit note  • Childcare provision  • More reassurance and support from healthcare professionals  • Presence of family members in treatment room | • Reduce waiting list times  • More availability in local area and general practice |
| **Transcranial electrical stimulation (home)** | • Evidence of clinical effectiveness | • Training session in clinic initially | • Availability of healthcare professional for troubleshoot and support | • Reminders to self-administer | • Comfort of having treatment at home |
| **Combined stimulation** | • Anecdotes of effectiveness from service users who had treatment |  |  | • More flexible treatment regime schedule  • Having more knowledgeable healthcare professionals | • More availability in local area and general practice  • Possibility of having home treatment |
