# Supplementary material
Source: Research Square preprint supplement (doi:10.21203/rs.3.rs-9814760/v1)
Supplement: Supplementary file 2 [file d195174c2b23934c1d7722c7.docx]

**SUPPLEMENTARY MATERIAL**

**Prospective acceptability and barriers to uptake for non-invasive brain stimulation for mental health treatment:**

**a co-produced nationwide survey of people with lived experience of mental health conditions**

Sue Fen Tan, Jemima Shickle, Lucy Webster, Debbie Butler, David Goddard, Louisa Gerrard, Mohammad Zia Ul Haq Katshu, Sudheer Lankappa, Cyril Atkinson-Clement, Marcus Kaiser, Richard Morriss, Paul M Briley

**Fig. S1: Flow diagram of Prolific and non-Prolific survey participants after exclusion criteria.**

**
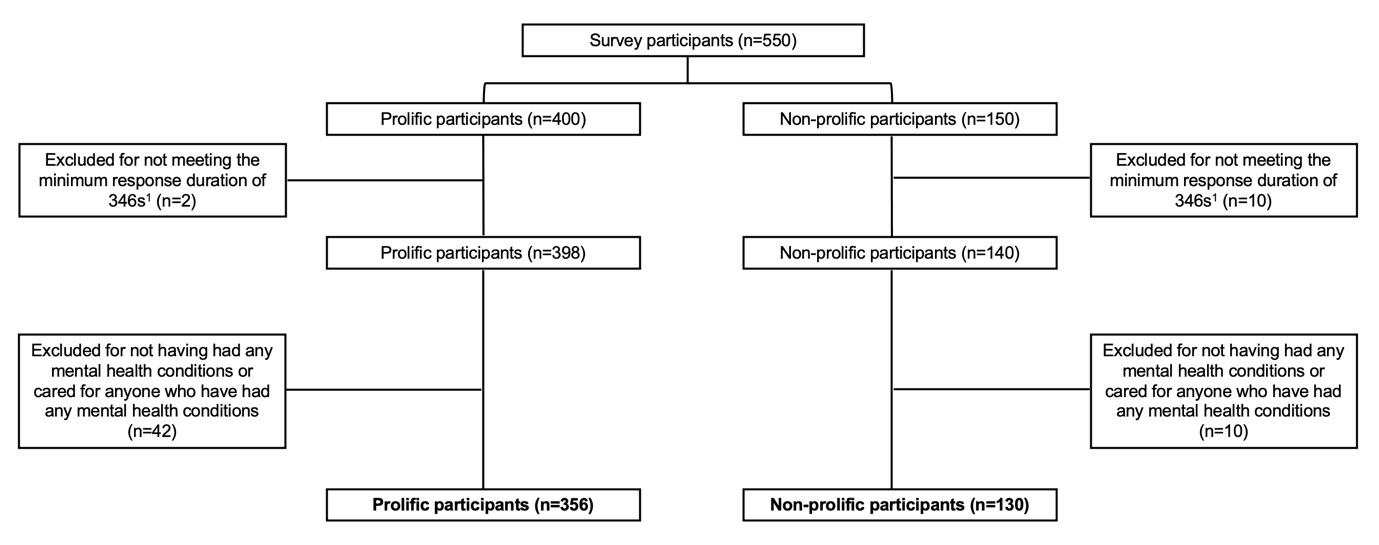
**

Minimum survey response duration of 346s was derived after allocating 2s each to 38 mandatory questions and allowing for 10s each for three infographics and 260s for all the videos, excluding credit.

**Table S1: Demographic and clinical characteristics of survey participants.**

|  | **Prolific (N=356)** | | **Non-prolific (N=130)** | | **Total (N=486)** | |
| --- | --- | --- | --- | --- | --- | --- |
| **Demographic factors** | | | | | | |
| **Age group** | | | | |  | |
| <20 | 14 (3.9%) | | 21 (16.2%) | | 35 (7.2%) | |
| 21-30 | 132 (37.1%) | | 40 (30.8%) | | 172 (35.4%) | |
| 31-40 | 104 (29.2%) | | 35 (26.9%) | | 139 (28.6%) | |
| 41-50 | 54 (15.2%) | | 18 (13.8%) | | 72 (14.8%) | |
| 51-60 | 42 (11.8%) | | 13 (10.0%) | | 55 (11.3%) | |
| 61-70 | 8 (2.2%) | | 2 (1.5%) | | 10 (2.1%) | |
| 71-80 | 2 (0.6%) | | 1 (0.7%) | | 3 (0.6%) | |
| **Mean** | **35.6** | | **34.0** | |  | |
| **SD** | **11.6** | | **12.9** | |  | |
| **Gender** | | | | |  | |
| Man | 165 (46.3%) | | 35 (26.9%) | | 200 (41.2%) | |
| Woman | 180 (50.6%) | | 84 (64.6%) | | 264 (54.3%) | |
| Non-binary | 5 (1.4%) | | 6 (4.6%) | | 11 (2.3%) | |
| Trans-man | 2 (0.6%) | | 2 (1.5%) | | 4 (0.8%) | |
| Trans-woman | 1 (0.3%) | | 1 (0.7%) | | 2 (0.4%) | |
| Other | 1 (Fluid) (0.3%) | | 0 | | 1 (0.3%) | |
| Prefer not to disclose | 2 (0.6%) | | 2 (1.5%) | | 4 (0.8%) | |
| **Ethnicity** | | | | |  | |
| Asian or Asian British | 21 Indian  16 Pakistani  9 Any other Asian background  7 Bangladeshi  13 Chinese  **Total = 66 (18.5%)** | | 6 Indian  6 Pakistani  2 Any other Asian background  3 Bangladeshi  2 Chinese  **Total = 19 (14.6%)** | | 85 (17.5%) | |
| Black, Black British, Caribbean or African | 29 African  15 any other Black, Black British or Caribbean background  9 Caribbean  **Total = 53 (14.9%)** | | 1 African  1 Caribbean  **Total = 2 (1.5%)** | | 55 (11.3%) | |
| Mixed or multiple ethnic groups | 13 Any other Mixed or multiple ethnic background  14 White and Black African  14 White and Asian  22 White and Black Caribbean  **Total = 63 (17.7%)** | | 5 Any other Mixed or multiple ethnic background  4 White and Asian  6 White and Black African  **Total = 15 (11.5%)** | | 78 (16.0%) | |
| White | 11 Any other White background  155 English, Welsh, Scottish, Northern Irish or British  2 Irish  **Total = 168 (47.2%)** | | 12 Any other White background  79 English, Welsh, Scottish, Northern Irish or British  2 Irish  **Total = 93 (71.5%)** | | 261 (53.7%) | |
| Other | 4 Any other ethnic group  1 Arab  **Total = 5 (1.4%)** | | **Total = 0** | | 5 (1.4%) | |
| Prefer not to disclose | **Total = 1 (0.3%)** | | **Total = 1 (0.8%)** | | 2 (0.4%) | |
| **UK Region** | | | | |  | |
| East Midlands | 23 (6.5%) | | 31 (23.8%) | | 54 (11.1%) | |
| East England | 34 (9.6%) | | 3 (2.3%) | | 37 (7.6%) | |
| London | 83 (23.3%) | | 28 (21.5%) | | 111 (22.8%) | |
| Northeast England | 13 (3.7%) | | 4 (3.0%) | | 17 (3.5%) | |
| Northwest England | 35 (9.8%) | | 16 (12.3%) | | 51 (10.5%) | |
| West Midlands | 28 (7.9%) | | 8 (6.1%) | | 36 (7.4%) | |
| Yorkshire and Humber | 22 (6.2%) | | 6 (4.6%) | | 28 (5.8%) | |
| Southeast England | 52 (14.6%) | | 16 (12.3%) | | 68 (14.0%) | |
| Southwest England | 25 (7.0%) | | 6 (4.6%) | | 31 (6.4%) | |
| Northern Ireland | 2 (0.6%) | | 2 (1.5%) | | 4 (0.8%) | |
| Scotland | 25 (7.0%) | | 5 (3.8%) | | 30 (6.2%) | |
| Wales | 14 (3.9%) | | 5 (3.8%) | | 19 (3.9%) | |
| **Clinical Characteristics** | | | | | | |
|  | | **Prolific (N=356)** | | **Non-prolific (N=130)** | | **Total (N=486)** |

| **Limitation of activity** | | | |
| --- | --- | --- | --- |
| None | 172 (48.3%) | 41 (31.5%) | 213 (43.8%) |
| Moderately | 139 (39.0%) | 60 (46.2%) | 199 (40.9%) |
| Severely | 34 (9.6%) | 26 (20.0%) | 60 (12.3%) |
| Prefer not to say | 11 (3.1%) | 3 (2.3%) | 14 (2.9%) |

| **Current or Previous Treatment** | | |  |
| --- | --- | --- | --- |
| Medication | 242 (68.0%) | 89 (68.5%) | 331 (68.1%) |
| Non-prescribed (over the counter) medications or remedies (including supplements, herbal remedies, homeopathy) | 86 (24.2%) | 43 (33.1%) | 129 (26.5%) |
| Psychological (talking) therapies (e.g. counselling, cognitive behavioural therapy) | 241 (67.7%) | 91 (70.0%) | 332 (68.3%) |
| Mindfulness/meditation | 171 (48.0%) | 63 (48.5%) | 234 (48.1%) |
| Physical activity/physical therapy/activity scheduling | 138 (38.8%) | 53 (40.8%) | 191 (39.3%) |
| Alternative/complementary therapies that don't involve taking a drug (e.g. acupuncture, aromatherapy, reflexology) | 30 (8.4%) | 21 (16.2%) | 51 (10.5%) |
| Implanted devices (that involve surgery, e.g. implanted vagus nerve stimulators or deep brain stimulation) | 3 (0.8%) | 2 (1.5%) | 5 (1.0%) |
| Non-invasive brain stimulation/neuromodulation (e.g. TMS, tES, non-implanted vagus or peripheral nerve stimulation) | 5 (1.4%) | 6 (4.6%) | 11 (2.3%) |
| Electroconvulsive therapy (ECT) | 0 | 1 (0.8%) | 1 (0.2%) |
| Support groups | 57 (16.0%) | 38 (29.2%) | 95 (19.5%) |
| None of the above | 18 (5.1%) | 2 (1.5%) | 20 (4.1%) |

| **Types of Mental Health Diagnoses** | **N/486 (%)** |
| --- | --- |
| Neurodevelopmental disorders (including ASD1, ADHD2, intellectual disability, and dyspraxia) | 70 (14.4%) |
| Mood disorders (including depression and bipolar disorder) | 344 (70.8) |
| Anxiety and fear-related disorders (including phobias and panic attacks) | 322 (66.3%) |
| Personality disorders | 16 (3.3%) |
| Stress-related disorders (including PTSD3) | 56 (11.5%) |
| Obsessive-compulsive disorders | 30 (6.2%) |
| Eating disorders | 17 (3.5%) |
| Schizophrenia and primary psychotic disorders | 14 (2.9%) |
| Pregnancy, childbirth and the puerperium related disorders (including postnatal depression and puerperal psychosis) | 6 (1.2%) |
| Dissociative disorder | 6 (1.2%) |
| Bodily distress disorder | 2 (0.4%) |

Note:

1. ASD = autism spectrum disorder.
2. ADHD = attention-deficit hyperactivity disorder.
3. PTSD = post-traumatic stress disorder.

**Table S2: Statistical comparison between non-invasive brain stimulation techniques.**

| **Technique-related factors** | ***X2*(2) of all techniques,**  **p-value** | **TMS vs tES**  ***(Z, p-value)*** | **TMS vs Combined**  ***(Z, p-value)*** | **tES vs Combined**  ***(Z, p-value)*** | **tES clinic vs tES home**  ***(Z, p-value)*** |
| --- | --- | --- | --- | --- | --- |
| **Awareness** | N/A | TMS: 39.7%  tES: 31.7%  (3.369, <0.001) | N/A | N/A | N/A |
| **Mean sum of positive emotions** | 23.525, <0.001 | TMS: 1.551  tES: 1.414  (3.043, 0.002) | TMS: 1.551  Combined:1.294  (5.651, <0.001) | tES: 1.414  Combined:1.294  (2.346, 0.019) | N/A |
| **Interested** | 36.140, <0.001 | TMS: 69.96%  tES: 62.14%  (3.549, <0.001) | TMS: 69.96%  Combined: 56.79%  (5.977, <0.001) | tES: 62.14%  Combined: 56.79%  2.428, 0.015 | N/A |
| **Hopeful** | 19.596, <0.001 | TMS: 51.23%  tES: 44.24%  (2.997, 0.003) | TMS: 51.23%  Combined: 41.15%  (4.320, <0.001) | tES: 44.24%  Combined: 41.15%  (1.322, 0.186) | N/A |
| **Comfortable** | 12.723, 0.002 | TMS: 19.96%  tES: 20.16%  (0.112, 0.911) | TMS: 19.96%  Combined: 14.40%  (3.031, 0.002) | tES: 20.16%  Combined: 14.40%  (3.144, 0.002) | N/A |
| **Excited** | 3.321, 0.190 | N/A | N/A | N/A | N/A |
| **Neutral** | 16.900, <0.001 | TMS: 18.82%  tES: 23.05%  (3.209, 0.001) | TMS: 18.82%  Combined: 15.43%  (0.621, 0.535) | tES: 23.05%  Combined: 15.43%  (3.830, <0.001) | N/A |
| **Mean sum of negative emotions** | 40.029, <0.001 | TMS: 0.589  tES: 0.562  (0.860, 0.390) | TMS: 0.589  Combined: 0.747  (4.527, <0.001) | tES: 0.562  Combined: 0.747  (5.188, <0.001) | N/A |
| **Angry** | 4.000, 0.135 | N/A | N/A | N/A | N/A |
| **Confused** | 3.969, 0.137 | N/A | N/A | N/A | N/A |
| **Worried** | 36.144, <0.001 | TMS: 16.46%  tES: 17.28%  (0.416, 0.678) | TMS: 16.46%  Combined: 27.16%  (5.401, <0.001) | tES: 17.28%  Combined: 27.16%  (4.986, <0.001) | N/A |
| **Sceptical** | 9.905, 0.007 | TMS: 36.21%  tES: 31.28%  (2.268, 0.023) | TMS: 36.21%  Combined: 37.86%  (0.756, 0.450) | tES: 31.28%  Combined: 37.86%  (3.024, 0.002) | N/A |
| **Perceived safety** | 190.340, <0.001 | TMS: 74.28%  tES: 70.37%  (1.156, 0.248) | TMS: 74.28%  Combined: 49.59%  (10.450, <0.001) | tES: 70.37%  Combined: 49.59%  (10.537, <0.001) | N/A |
| **Perceived effectiveness** | 30.166, <0.001 | TMS: 17.08%  tES: 22.84%  (2.029, 0.042) | TMS: 17.08%  Combined: 29.01%  (4.556, <0.001) | tES: 22.84%  Combined: 29.01%  (3.418, <0.001) | N/A |
| **Likelihood of starting** | 123.027, <0.001 | TMS: 46.09%  tES clinic: 40.53%  (2.909, 0.004)  TMS: 46.09%  tES home: 44.44%  (2.823, 0.005) | TMS: 46.09%  Combined: 30.66%  (10.138, <0.001) | tES clinic: 40.53%  Combined: 30.66%  (8.177, <0.001)  tES home: 44.44%  Combined: 30.66%  (6.202, <0.001) | tES clinic: 40.53%  tES home: 44.44%  (0.599, 0.549) |
| **Likelihood of completing** | 116.827, <0.001 | TMS: 52.26%  tES clinic: 46.09%  (4.458, <0.001)  TMS: 52.26%  tES home: 46.30%  (3.989, <0.001) | TMS: 52.26%  Combined: 35.39%  (9.916, <0.001) | tES clinic: 46.09%  Combined: 35.39%  (7.751, <0.001)  tES home: 46.30%  Combined: 35.39%  (5.107, <0.001) | tES clinic: 46.09%  tES home: 46.30%  (1.048, 0.295) |

Glossary

TMS= Transcranial magnetic stimulation

tES = Transcranial electrical stimulation

Combined = Combined transcranial magnetic and electrical stimulation

**Table S3: Concerns and perceived barriers of non-invasive brain stimulation techniques.**

| **Theoretical Framework of Acceptability Themes** | **Perceived**  **effectiveness** | **Intervention coherence** | **Ethicality** | **Burden** | **Opportunity costs, burden, and self-efficacy** | |
| --- | --- | --- | --- | --- | --- | --- |
|  | **Effectiveness** | **Mechanism of action** | **Ethicality** | **Side effects** | **Practicalities and cost** | **Accessibility** |
| **Transcranial magnetic stimulation** | - Response rate - Effectiveness for comorbid disorder and resistant cases - Comparison with other types of treatment - Long-term effectiveness | - Area of stimulation - Effect on brain waves, structure, and neurotransmitter - Interaction with existing treatment | - Inability to provide consent - Potential misuse by professionals - Technique felt experimental | - Long-term side effects - Seizure, sleep, dependence - Safety in pregnancy | - Structure of each treatment session - Duration and number of treatment session - Time commitment - Cost of treatment - Cost of travel | - Criteria for eligibility and contraindication for treatment - Long waiting list - Lack of availability in local area or home - Inability to leave home |
| **Transcranial electrical stimulation (clinic)** | - Response rate - Long-term effectiveness - Comparison with other types of treatment - Effectiveness for comorbid disorder and complex cases - Scepticism as treatment is not approved in guidelines - Current is too weak to produce clinical benefits | - Unsure of area of target and exact mechanism of action as pad placements are not precise - Interaction with existing treatment | - Heavily compared to electroconvulsive therapy - Not trusting of device | - Long-term side effects - Specific worries around tingling burning, electrocution, and memory loss - Possibility of seizure risk | - Structure of each treatment session - Duration and number of treatment session - Time commitment - Cost of treatment - Cost of travel | - Concerns about commercial devices being widely available - Treatment not being funded by National Health Services - Long waiting list - Lack of availability in local area or home |
| **Transcranial electrical stimulation (home)** | - Possibility of wrong technique affecting effectiveness - Home device is less effective than clinic device |  | - Lack of privacy from family members at home - Device endanger family members or pets | - Possibility of wrong technique causing dangerous side effects | - Lack discipline and motivation to adhere to treatment regime - Cost of device | - Long waiting time for device to be delivered |
| **Combined stimulation** | - More large-scale studies needed as effectiveness does not appear conclusive | - Exact mechanism not widely known | - Perceived to be more invasive | - More side effects due to combination of techniques - Long-term side effects - Difficulty in identifying the individual technique causing side effect | - Time commitment | - Criteria for eligibility and contraindication for treatment |

**Table S4: Univariate associations between geographical location, treatments other than prescribed medication and psychological therapy, and acceptability outcome measures.**

|  | **Awareness**  **OR (95% CI)** | **Positive1 emotions towards treatment** | **Negative2 emotions towards treatment** | **Perceived safety** | **Perceived effectiveness** | **Likelihood of starting treatment** | **Likelihood of completing treatment** |
| --- | --- | --- | --- | --- | --- | --- | --- |
| **Demographic factors** | | | | | | | |
| **Geographical location**  **(London comparison group)** | **TMS**  Devolved nations  0.575  (0.287-1.153)  Northern England  0.877  (0.509-1.510)  Midlands  1.318  (0.771-2.255)  South and East England  0.981  (0.599-1.608)  **tES**  Devolved nations  0.366*  (0.164-1.219)  Northern England  0.866  (0.493-1.520)  Midlands  0.988  (0.562-1.738)  South and East England  0.774  (0.459-1.303) | **TMS**  Devolved nations  1.081  (0.601-1.944)  Northern England  1.130  (0.692-1.844)  Midlands  1.236  (0.751-2.036)  South and East England  1.232  (0.786-1.933)  **tES**  Devolved nations  0.745  (0.413-1.343)  Northern England  1.065  (0.653-1.737)  Midlands  1.189  (0.723-1.954)  South and East England  1.192  (0.762-1.868)  **Combined**  Devolved nations  0.659  (0.363-1.195)  Northern England  1.080  (0.662-1.763)  Midlands  1.044  (0.634-1.718)  South and East England  1.037  (0.662-1.626) | **TMS**  Devolved nations  1.813  (0.973-3.374)  Northern England  0.931  (0.544-1.595)  Midlands  1.096  (0.638-1.883)  South and East England  1.048  (0.643-1.711)  **tES**  Devolved nations  1.446  (0.776-2.699)  Northern England  0.900  (0.527-1.540)  Midlands  0.652  (0.371-1.145)  South and East England  0.972  (0.596-1.587)  **Combined**  Devolved nations  1.742  (0.947-3.203)  Northern England  1.059  (0.633-1.772)  Midlands  0.967  (0.571-1.636)  South and East England  1.138  (0.710-1.824) | **TMS**  Devolved nations  1.082  (0.580-2.016)  Northern England  1.592  (0.943-2.686)  Midlands  1.811*  (1.062-3.093)  South and East England  1.169  (0.725-1.885)  **tES**  Devolved nations  0.739  (0.403-1.358)  Northern England  1.182  (0.708-1.972)  Midlands  1.445  (0.856-2.438)  South and East England  1.068  (0.668-1.707)  **Combined**  Devolved nations  0.761  (0.420-1.380)  Northern England  1.314  (0.796-2.168)  Midlands  1.231  (0.739-2.048)  South and East England  0.908  (0.575-1.435) | **TMS**  Devolved nations  0.976  (0.445-2.143)  Northern England  1.587  (0.838-3.004)  Midlands  1.284  (0.665-2.479)  South and East England  1.274  (0.703-2.312)  **tES**  Devolved nations  0.963  (0.472-1.962)  Northern England  1.471  (0.824-2.630)  Midlands  1.107  (0.608-2.018)  South and East England  1.031  (0.599-1.775)  **Combined**  Devolved nations  0.553  (0.280-1.090)  Northern England  0.739  (0.426-1.283)  Midlands  0.844  (0.484-1.471)  South and East England  0.645  (0.388-1.074) | **TMS**  Devolved nations  1.045  (0.581-1.879)  Northern England  1.451  (0.888-2.373)  Midlands  1.165  (0.708-1.919)  South and East England  1.334  (0.850-2.094)  **tES clinic**  Devolved nations  0.946  (0.525-1.707)  Northern England  0.964  (0.589-1.578)  Midlands  1.049  (0.635-1.732)  South and East England  0.967  (0.614-1.519)  **tES home**  Devolved nations  0.776  (0.434-1.385)  Northern England  1.123  (0.692-1.822)  Midlands  1.737*  (1.058-2.849)  South and East England  1.387  (0.889-2.164)  **Combined**  Devolved nations  0.898  (0.501-1.606)  Northern England  1.197  (0.736-1.946)  Midlands  1.150  (0.701-1.887)  South and East England  0.918  (0.587-1.433) | **TMS**  Devolved nations  1.053  (0.587-1.889)  Northern England  1.415  (0.868-2.309)  Midlands  1.398  (0.850-2.300)  South and East England  1.260  (0.805-1.972)  **tES clinic**  Devolved nations  1.127  (0.629-2.020)  Northern England  1.061  (0.652-1.726)  Midlands  1.261  (0.768-2.071)  South and East England  1.036  (0.662-1.618)  **tES home**  Devolved nations  1.088  (0.609-1.943)  Northern England  1.275  (0.785-2.069)  Midlands  1.639  (0.999-2.689)  South and East England  1.395  (0.894-2.179)  **Combined**  Devolved nations  1.097  (0.615-1.960)  Northern England  1.160  (0.715-1.881)  Midlands  1.251  (0.764-2.048)  South and East England  0.950  (0.609-1.481) |
| **Current/ previous treatment3** | | | | | | | |
| **Over-the-counter medication**  **(No over-the-counter medication comparison group)** | **TMS**  1.175  (0.767-1.797)  **tES**  1.156  (0.736-1.817) | **TMS**  0.774  (0.523-1.145)  **tES**  0.986  (0.668-1.455)  **Combined**  0.791  (0.534-1.170) | **TMS**  1.418  (0.932-2.155)  **tES**  1.461  (0.958-2.226)  **Combined**  1.314  (0.874-1.978) | **TMS**  0.896  (0.591-1.359)  **tES**  1.160  (0.771-1.744)  **Combined**  0.960  (0.645-1.430) | **TMS**  1.202  (0.725-1.990)  **tES**  0.883  (0.553-1.411)  **Combined**  1.127  (0.725-1.752) | **TMS**  1.115  (0.754-1.649)  **tES clinic**  1.023  (0.691-1.516)  **tES home**  0.915  (0.621-1.346)  **Combined**  0.873  (0.592-1.287) | **TMS**  0.919  (0.623-1.357)  **tES clinic**  0.922  (0.626-1.361)  **tES home**  0.969  (0.658-1.426)  **Combined**  0.840  (0.571-1.236) |
| **Mindfulness/ meditation**  **(No mindfulness/ medication comparison group)** | **TMS**  0.944  (0.635-1.402)  **tES**  1.473  (0.967-2.241) | **TMS**  1.254  (0.878-1.788)  **tES**  1.355  (0.950-1.931)  **Combined**  0.978  (0.685-1.395) | **TMS**  0.874  (0.594-1.285)  **tES**  0.773  (0.522-1.145)  **Combined**  0.994  (0.685-1.442) | **TMS**  1.023  (0.701-1.493)  **tES**  1.363  (0.941-1.978)  **Combined**  1.058  (0.737-1.517) | **TMS**  1.517  (0.949-2.423)  **tES**  1.307  (0.853-2.006)  **Combined**  0.814  (0.543-1.220) | **TMS**  1.176  (0.824-1.679)  **tES clinic**  1.175  (0.822-1.680)  **tES home**  1.313  (0.924-1.866)  **Combined**  1.130  (0.794-1.606) | **TMS**  1.146  (0.804-1.632)  **tES clinic**  1.036  (0.728-1.473)  **tES home**  1.123  (0.791-1.595)  **Combined**  0.892  (0.629-1.267) |
| **Physical activity/ therapy**  **(No physical activity/ therapy comparison group)** | **TMS**  1.313  (0.880-1.960)  **tES**  1.133  (0.740-1.735) | **TMS**  1.026  (0.714-1.476)  **tES**  1.154  (0.803-1.657)  **Combined**  1.174  (0.816-1.689) | **TMS**  1.305  (0.882-1.931)  **tES**  1.252  (0.843-1.863)  **Combined**  1.099  (0.752-1.606) | **TMS**  0.987  (0.670-1.452)  **tES**  1.084  (0.743-1.584)  **Combined**  1.275  (0.881-1.848) | **TMS**  1.320  (0.824-2.117)  **tES**  1.323  (1.168-2.042)  **Combined**  1.575*  (1.043-2.377) | **TMS**  1.158  (0.806-1.667)  **tES clinic**  1.264  (0.877-1.822)  **tES home**  1.085  (0.758-1.554)  **Combined**  1.196  (0.834-1.714) | **TMS**  1.204  (0.839-1.730)  **tES clinic**  1.182  (0.824-1.694)  **tES home**  1.150  (0.803-1.647)  **Combined**  1.175  (0.821-1.682) |
| **Alternative/ complementary therapy**  **(No alternative/ complementary therapy comparison group)** | **TMS**  2.040*  (1.138-3.658)  **tES**  1.644  (0.891-3.031) | **TMS**  1.194  (0.681-2.092)  **tES**  1.391  (0.796-2.428)  **Combined**  1.331  (0.761-2.328) | **TMS**  0.606  (0.325-1.129)  **tES**  0.834  (0.453-1.536)  **Combined**  0.628  (0.345-1.143) | **TMS**  0.941  (0.517-1.709)  **tES**  1.055  (0.587-1.898)  **Combined**  0.845  (0.477-1.495) | **TMS**  0.822  (0.397-1.702)  **tES**  1.003  (0.516-1.948)  **Combined**  0.687  (0.361-1.310) | **TMS**  1.040  (0.593-1.822)  **tES clinic**  1.170  (0.666-2.056)  **tES home**  1.273  (0.730-2.219)  **Combined**  1.164  (0.667-2.030) | **TMS**  1.033  (0.590-1.806)  **tES clinic**  1.132  (0.648-1.976)  **tES home**  1.146  (0.658-1.998)  **Combined**  1.172  (0.674-2.040) |
| **Support groups**  **(No support groups comparison group)** | **TMS**  1.355  (0.860-2.138)  **tES**  0.827  (0.507-1.361) | **TMS**  1.007  (0.660-1.539)  **tES**  0.908  (0.595-1.384)  **Combined**  1.133  (0.742-1.728) | **TMS**  0.839  (0.529-1.332)  **tES**  1.103  (0.696-1.747)  **Combined**  0.811  (0.519-1.267) | **TMS**  1.114  (0.709-1.751)  **tES**  0.790  (0.508-1.228)  **Combined**  1.240  (0.803-1.912) | **TMS**  0.973  (0.564-1.680)  **tES**  1.384  (0.843-2.275)  **Combined**  1.121  (0.696-1.808) | **TMS**  0.964  (0.631-1.471)  **tES clinic**  0.903  (0.590-1.383)  **tES home**  0.753  (0.495-1.145)  **Combined**  1.361  (0.893-2.073) | **TMS**  0.958  (0.628-1.461)  **tES clinic**  1.052  (0.691-1.603)  **tES home**  0.862  (0.567-1.309)  **Combined**  0.850  (0.774-1.786) |

Glossary

TMS= Transcranial magnetic stimulation

tES = Transcranial electrical stimulation

Combined = Combined transcranial magnetic and electrical stimulation

South and East England = Southeast England, Southwest England, and East of England

North England = Northeast England, Northwest England, and Yorkshire and Humber

Midlands = East Midlands and West Midlands

Devolved nations = Northern Ireland, Scotland, and Wales

**Supplemental Text 1. Goodness of fit statistics and coefficients for path models**

The final path model for each technique (TMS, home tES, Combined NIBS) met a range of goodness of fit criteria (Hooper et al., 2008; Hu & Bentler, 1999).

- Chi-square test for discrepancy (non-significant value indicates close fit between model-implied and observed covariance matrices). TMS: *χ2*(22)=19.888, *p*=0.590; Home tES: *χ2*(18)=21.360, *p*=0.262; Combined NIBS: *χ2*(31)=33.729, *p*=0.337
- Comparative Fit Index (CFI) and Tucker-Lewis Index (TLI), which compare the Chi-square statistic to that of the null (independence) model while adjusting for sample size and model complexity (values > 0.95 indicate good model fit). TMS: CFI 1.000, TLI 1.000; Home tES: CFI 1.000, TLI 0.999; Combined NIBS: CFI 1.000, TLI 0.999
- Standardised Root Mean Square Residual (SRMR), which reflects the average standardised residual between observed and predicted correlations (values <0.07 indicate good model fit). TMS: 0.042; Home tES: 0.030; Combined NIBS: 0.066
- Root Mean Square Error of Approximation (RMSEA), which quantifies the degree of approximation error in the population covariance matrix per degree of freedom, adjusting for model complexity (values <0.06, with upper 90% confidence limit <0.08, indicate good model fit). TMS: 0.000 (90% CI 0.000-0.034); Home tES: 0.020 (90% CI 0.000-0.047); Combined NIBS: 0.013 (90% CI 0.000-0.037)

Coefficients for each path in the final models are given in Table S5. Indirect relationships from clinical/demographic predictors, via perceptions of effectiveness, safety, and positive emotions, to the two outcomes (likely to start treatment if offered, confident that would be able to complete a treatment course) are given in Table S6.

**Table S5: Direct relationships for final path models.**

|  | **Awareness** | **Perceived efficacy** | **Perceived safety** | **Positive emotions towards treatment** | **Likelihood of starting treatment** | **Likelihood of completing treatment** |
| --- | --- | --- | --- | --- | --- | --- |
| **Transcranial magnetic stimulation (TMS)** | | | | | | |
| **Sample** | *b*=.729 (*SE*=.133)  *p*<.001 (*β*=.307) |  |  |  |  |  |
| **Awareness** |  | *b*=.226 (*SE*=.048)  *p*<.001 (*β*=.231) | *b*=.144 (*SE*=.055)  *p*=.009 (*β*=.149) | *b*=.215 (*SE*=.056)  *p*<.001 (*β*=.216) |  |  |
| **Prescribed medication** |  |  | *b*=.299 (*SE*=.120)  *p*=.013 (*β*=.136) | *b*=.286 (*SE*=.113)  *p=*.011 (*β*=.127) |  |  |
| **Female gender** |  |  |  | *b*=-.325 (*SE*=.127)  *p*=.010 (*β*=-.152) |  |  |
| **Perceived efficacy** |  |  |  |  | *b*=.302 (*SE*=.063)  *p*<.001 (*β*=.211) | *b*=.223 (*SE*=.063)  *p*<.001 (*β*=.178) |
| **Perceived safety** |  |  |  |  | *b*=.427 (*SE*=.053)  *p*<.001 (*β*=.297) | *b*=.368 (*SE*=.053)  *p*<.001 (*β*=.292) |
| **Positive emotions to treatment** |  |  |  |  | *b*=.565 (*SE*=.067)  *p*<.001 (*β*=.403) | *b*=.292 (*SE*=.060)  *p*<.001 (*β*=.238) |
| **Negative emotions to treatment** |  |  |  |  |  | *b*=-.196 (*SE*=.073)  *p*=.008 (*β*=-.113) |
| **Home transcranial electrical stimulation (tES)** | | | | | | |
| **Sample** | *b*=.436 (*SE*=.143)  *p*=.002 (*β*=.190) |  |  |  |  |  |
| **Awareness** |  |  | *b*=.264 (*SE*=.051)  *p<.001* (*β*=.257) | *b*=.164 (*SE*=.061)  *p*=.007 (*β*=.163) |  |  |
| **Asian ethnicity** |  |  | *b*=-.364 (*SE*=.159)  *p*=.022 (*β*=-.133) |  |  |  |
| **Mixed ethnicity** |  |  |  |  |  | *b*=-.358 (*SE*=.170)  *p*=.035 (*β*=-.105) |
| **Current/ Past carer** |  |  |  | *b*=.305 (*SE*=.121)  *p*=.012 (*β*=.142) |  |  |
| **Perceived safety** |  |  |  |  | *b*=.383 (*SE*=.055)  *p<.001* (*β*=.315) | *b*=.390 (*SE*=.060)  *p<.001* (*β*=.326) |
| **Positive emotions to treatment** |  |  |  |  | *b*=.459 (*SE*=.066)  *p<.001* (*β*=.370) | *b*=.406 (*SE*=.070)  *p<.001* (*β*=.333) |
| **Combined NIBS** | | | | | | |
| **Sample** | *b*=.549 (*SE*=.156)  *p*<.001 (*β*=.236) |  |  |  |  |  |
| **tES awareness** |  | *b*=.343 (*SE*=.059)  *p<.001* (*β*=.321) | *b*=.247 (*SE*=.052)  *p<.001* (*β*=.242) | *b*=.301 (*SE*=.063)  *p<.001* (*β*=.296) |  |  |
| **Black ethnicity** |  |  | *b*=-.555 (*SE*=.209)  *p*=.008 (*β*=-.168) |  |  |  |
| **Female gender** |  |  |  |  |  | *b*=-.454 (*SE*=.169)  *p*=.007 (*β*=-.133) |
| **Older age** |  | *b*=-.020 (*SE*=.005)  *p<.001* (*β*=-.217) |  |  |  |  |
| **Current/ Past carer** |  | *b*=.420 (*SE*=.121)  *p*=.001 (*β*=.182) |  |  | *b*=.575 (*SE*=.185)  *p*=.002 (*β*=.155) |  |
| **Perceived efficacy** |  |  |  |  |  | *b*=.209 (*SE*=.071)  *p*=.003 (*β*=.138) |
| **Perceived safety** |  |  |  |  | *b*=.898 (*SE*=.080)  *p*<.001 (*β*=.534) | *b*=.758 (*SE*=.088)  *p*<.001 (*β*=.477) |
| **Positive emotions to treatment** |  |  |  |  | *b*=.589 (*SE*=.079)  *p*<.001 (*β*=.350) | *b*=.443 (*SE*=.092)  *p*<.001 (*β*=.278) |

Note

Shown are direct paths (from row label to column label) included in each of the final models. For each path, values are unstandardised probit coefficients (b), with standard errors (SE) and p-values, alongside standardised probit coefficients (β). Unstandardised probit coefficients indicate the effect of a one-unit increase in the predictor (for binary predictors, the effect of moving from the reference to the indicated category) on the latent continuous variable underlying the ordinal outcome. Standardised probit coefficients express the effect in standard deviation units of both the predictor and latent continuous variable (binary predictors are not standardised). Reference categories for binary variables are: for experience of mental health medication – lack of this experience; for female gender – male gender; for Black, Asian, or Mixed ethnicity – White ethnicity; for carer experience – lack of this experience. For Sample, the reference category was the Prolific sample, and the indicated category was the non-Prolific sample. Notably, sample solely predicted awareness in each of the three models.

|  | **Via perceived efficacy** | | **Via perceived safety** | | **Via positive emotions towards treatment** | |
| --- | --- | --- | --- | --- | --- | --- |
|  | **Likelihood of starting treatment** | **Likelihood of completing treatment** | **Likelihood of starting treatment** | **Likelihood of completing treatment** | **Likelihood of starting treatment** | **Likelihood of completing treatment** |
| **Transcranial magnetic stimulation (TMS)** | | | | | | |
| **Awareness** | *b*=.068 (*SE*=.020)  *p*=.001 (*β*=.049) | *b*=.050 (*SE*=.017)  *p*=.003 (*β*=.041) | *b*=.062 (*SE*=.025)  *p*=.012 (*β*=.044) | *b*=.053 (*SE*=.021)  *p*=.012 (*β*=.043) | *b*=.121 (*SE*=.034)  *p*<.001 (*β*=.087) | *b*=.063 (*SE*=.021)  *p*=.003 (*β*=.051) |
| **Prescribed medication** |  |  | *b*=.128 (*SE*=.054)  *p*=.018 (*β*=.041) | *b*=.110 (*SE*=.047)  *p*=.021 (*β*=.040) | *b*=.161 (*SE*=.066)  *p*=.014 (*β*=.051) | *b*=.083 (*SE*=.037)  *p*=.026 (*β*=.030) |
| **Female gender** |  |  |  |  | *b*=-.184 (*SE*=.072)  *p*=.011 (*β*=-.061) | *b*=-.095 (*SE*=.041)  *p*=.022 (*β*=-.036) |
| **Home transcranial electrical stimulation (tES)** | | | | | | |
| **Awareness** |  |  | *b*=.101 (*SE*=.024)  *p<.001* (*β*=.081) | *b*=.103 (*SE*=.025)  *p<.001* (*β*=.084) | *b*=.075 (*SE*=.030)  *p*=.012 (*β*=.060) | *b*=.067 (*SE*=.027)  *p*=.015 (*β*=.054) |
| **Asian ethnicity** |  |  | *b*=-.139 (*SE*=.065)  *p*=.032 (*β*=-.042) | *b*=-.142 (*SE*=.066)  *p*=.032 (*β*=-.043) |  |  |
| **Current/ Past carer** |  |  |  |  | *b*=.140 (*SE*=.059)  *p*=.018 (*β*=.052) | *b*=.124 (*SE*=.054)  *p*=.021 (*β*=-.047) |
| **Combined NIBS** | | | | | | |
| **tES awareness** |  | *b*=.072 (*SE*=.027)  *p*=.007 (*β*=.044) | *b*=.222 (*SE*=.050)  *p<.001* (*β*=.129) | *b*=.187 (*SE*=.042)  *p*<.001 (*β*=.116) | *b*=.178 (*SE*=.044)  *p*<.001 (*β*=.104) | *b*=.133 (*SE*=.038)  *p<.001* (*β*=.082) |
| **Black ethnicity** |  |  | *b*=-.498 (*SE*=.191)  *p*=.009 (*β*=-.090) | *b*=-.420 (*SE*=.163)  *p*=.010 (*β*=-.080) |  |  |
| **Older age** |  | *b*=-.004 (*SE*=.002)  *p*=.025 (*β*=-.030) |  |  |  |  |
| **Current/ Past carer** |  | *b*=-.088 (*SE*=.042)  *p*=.036 (*β*=-.025) |  |  |  |  |

**Table S6: Indirect relationships for final path models.**

*Shown are indirect paths (from row label to column label via column-pair label) in each of the final models. For each path, values are unstandardised probit coefficients (b), with standard errors (SE) and p-values, alongside standardised probit coefficients (β). Reference categories for binary variables are: for experience of mental health medication – lack of this experience; for female gender – male gender; for Black or Asian ethnicity – White ethnicity; for carer experience – lack of this experience.*

**References**

1. Hooper, D., Coughlan, J., & Mullen, M. R. (2008). Structural equation modelling: guidelines for determining model fit.
2. Hu, L.-t., & Bentler, P. M. (1999). Cutoff criteria for fit indexes in covariance structure analysis: Conventional criteria versus new alternatives. *Structural Equation Modeling*, *6*(1), 1-55. <https://doi.org/10.1080/10705519909540118>
